# Supplementary material
Source: Springer Nature journal article supplement (https://www.springermedizin.de/resource/supplementary/13058_2010_9525_MOESM7_ESM.pdf/9702292)

**A** HER2 total vs. phospho-HER1-HER2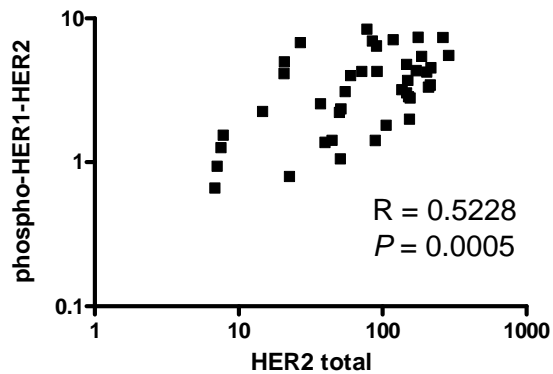**B** HER1 total vs. phospho-HER1-HER2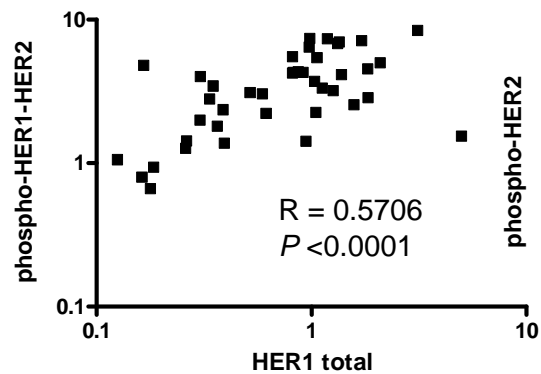**C** HER2 total vs. phospho-HER2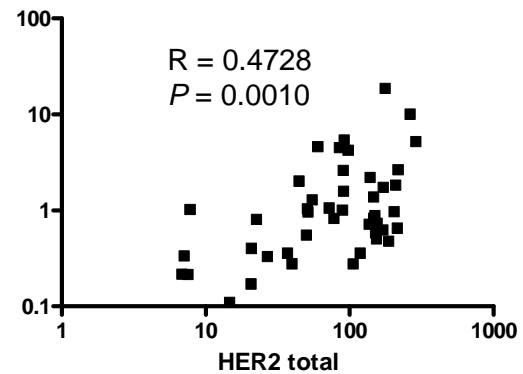**D** phospho-HER1-HER2 vs. HER1-HER2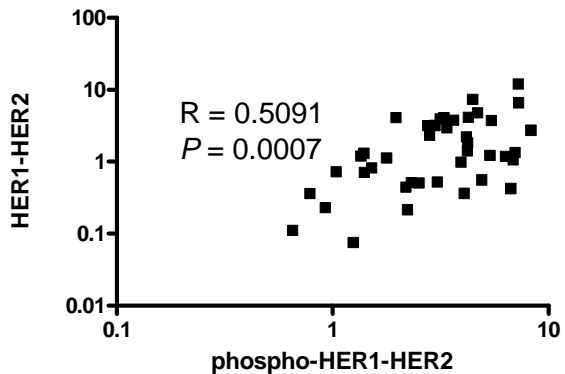**E** phospho-HER1-HER2 vs phospho-HER2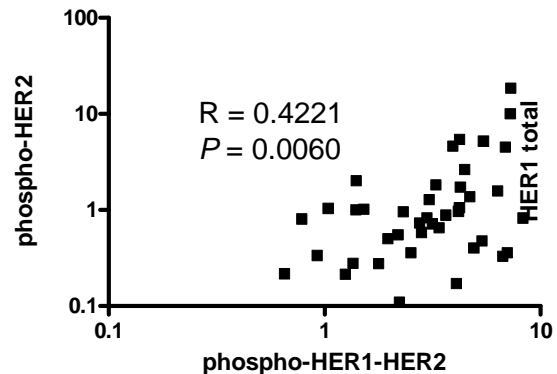**F** HER2 total vs. HER1 total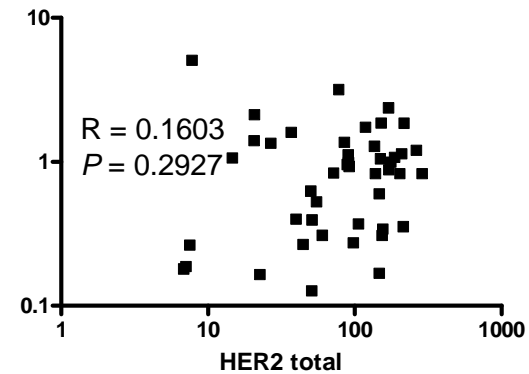

Supplement: MOESM7 [file 9702292]
